# Supplementary material for: Genomic Screening Identifies Individuals at High Risk for Hereditary Transthyretin Amyloidosis
Source: J Pers Med. 2021 Jan 15;11(1):49. doi: 10.3390/jpm11010049 (PMC7829706; doi:10.3390/jpm11010049)
Supplement: Supplementary file 1 [file jpm-11-00049-s001.pdf]

*Supplementary Materials*

## Genomic screening identifies individuals at high risk for hereditary transthyretin amyloidosis

Emily R. Soper, MS<sup>1,2#</sup>, Sabrina A. Suckiel, MS<sup>1,2#</sup>, Giovanna T. Braganza, BS<sup>1</sup>, Amy R. Kontorovich, MD, PhD<sup>2,3</sup>, Eimear E. Kenny, PhD<sup>1,2,4</sup>, Noura S. Abul-Husn, MD, PhD<sup>1,2,4\*</sup>

<sup>1</sup> The Institute for Genomic Health, Icahn School of Medicine at Mount Sinai, New York, NY, USA

<sup>2</sup> Department of Medicine, Icahn School of Medicine at Mount Sinai, New York, NY, USA

<sup>3</sup> The Zena and Michael A. Wiener Cardiovascular Institute, Icahn School of Medicine, New York, NY, USA

<sup>4</sup> Department of Genetics and Genomic Sciences, Icahn School of Medicine at Mount Sinai, New York, NY, USA

# These authors contributed equally to this work.

\* Correspondence: [noura.abul-husn@mssm.edu](mailto:noura.abul-husn@mssm.edu)

**Table S1.** Presence of hATTR-related systemic features and related symptoms in 32 V142I variant positive individuals.

**Table S2.** Presence of hATTR-related systemic features by age, sex, and self-reported ancestry after follow up with recommended specialists.

**Citation:** Soper, E.R.; Suckiel, S.A.; Braganza, G.T.; Kontorovich, A.R.; Kenny, E.E.; and Abul-Husn, N.S. Genomic screening identifies individuals at high risk for hereditary transthyretin amyloidosis. *J. Pers. Med.* **2021**, *11*, 49. <https://doi.org/10.3390/jpm11010049>

Received: 21 December 2020

Accepted: 09 January 2021

Published: 15 January 2021

**Publisher's Note:** MDPI stays neutral with regard to jurisdictional claims in published maps and institutional affiliations.

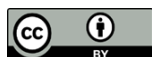

**Copyright:** © 2021 by the authors. Submitted for possible open access publication under the terms and conditions of the Creative Commons Attribution (CC BY) license (<http://creativecommons.org/licenses/by/4.0/>).

**Table S1.** Presence of hATTR-related systemic features and related symptoms in 32 V142I variant positive individuals.

| Phenotype                                                 | Systemic feature /<br>Related symptom | No. (%)<br>at result<br>disclosure | No. (%)<br>after specialist<br>follow-up | No. (%)<br>with family<br>history* |
|-----------------------------------------------------------|---------------------------------------|------------------------------------|------------------------------------------|------------------------------------|
| Cardiac                                                   | Heart failure                         | 4 (13)                             | 5 (16)                                   | 6 (19)                             |
|                                                           | Cardiomyopathy                        | 1 (3)                              | 1 (3)                                    | 1 (3)                              |
|                                                           | Atrial fibrillation                   | 0 (0)                              | 1 (3)                                    | 3 (9) <sup>†</sup>                 |
|                                                           | Shortness of breath                   | 16 (50)                            | 19 (59)                                  | -                                  |
|                                                           | Dizziness                             | 8 (25)                             | 12 (38)                                  | -                                  |
|                                                           | Syncope                               | 4 (13)                             | 6 (19)                                   | -                                  |
|                                                           | Palpitations                          | 9 (28)                             | 12 (38)                                  | -                                  |
|                                                           | Edema                                 | 9 (28)                             | 10 (31)                                  | -                                  |
| Peripheral<br>neuropathy                                  | Carpal tunnel syndrome                | 10 (31)                            | 10 (31)                                  | 8 (25)                             |
|                                                           | Spinal stenosis                       | 10 (31)                            | 10 (31)                                  | 0 (0)                              |
|                                                           | Carpal tunnel-related symptoms        | 13 (41)                            | 15 (47)                                  | -                                  |
|                                                           | Gait/Balance problems                 | 11 (34)                            | 13 (41)                                  | -                                  |
|                                                           | Muscle weakness                       | 13 (41)                            | 13 (41)                                  | -                                  |
|                                                           | Numbness/tingling                     | 17 (53)                            | 20 (63)                                  | -                                  |
|                                                           | Pain in extremities                   | 14 (44)                            | 14 (44)                                  | -                                  |
|                                                           | Back pain                             | 16 (50)                            | 18 (56)                                  | -                                  |
|                                                           | Temperature sensitivity               | 0 (0)                              | 4 (13)                                   | -                                  |
|                                                           | Joint pain                            | 18 (56)                            | 19 (59)                                  | -                                  |
| Autonomic<br>neuropathy                                   | Autonomic dysfunction <sup>#</sup>    | 1 (3)                              | 1 (3)                                    | 0 (0)                              |
|                                                           | Incontinence                          | 4 (13)                             | 5 (16)                                   | 0 (0)                              |
|                                                           | Sexual<br>dysfunction/Impotence       | 3 (9)                              | 4 (13)                                   | 0 (0)                              |
|                                                           | Nausea/vomiting                       | 6 (19)                             | 7 (22)                                   | -                                  |
|                                                           | Diarrhea                              | 8 (25)                             | 8 (25)                                   | -                                  |
|                                                           | Constipation                          | 12 (38)                            | 15 (47)                                  | -                                  |
|                                                           | Loss of appetite/early satiety        | 9 (28)                             | 10 (31)                                  | -                                  |
| Presence of any<br>systemic feature or<br>related symptom |                                       | 30 (94)                            | 31 (97)                                  | -                                  |
| Presence of any<br>systemic feature only                  |                                       | 18 (56)                            | 19 (59)                                  | 15 (47)                            |

\* Family history was assessed for presence of hATTR-related systemic features only.

<sup>†</sup> Family history was assessed broadly for arrhythmia and not specifically for atrial fibrillation.<sup>#</sup> Autonomic dysfunction includes gastroparesis and orthostatic hypotension.

**Table S2.** Presence of hATTR-related systemic features by age, sex, and self-reported ancestry after follow up with recommended specialists.

| Demographic variable            | Presence of any hATTR-related systemic feature | <i>P</i> -value |
|---------------------------------|------------------------------------------------|-----------------|
|                                 | No. (%)                                        |                 |
| <60 years (N=18)                | 9 (50)                                         | 0.29            |
| ≥60 years (N=14)                | 10 (71)                                        |                 |
| Female (N=26)                   | 16 (62)                                        | 0.67            |
| Male (N=6)                      | 3 (50)                                         |                 |
| African American/African (N=17) | 9 (53)                                         | 0.49            |
| Hispanic/Latinx (N=15)          | 8 (68)                                         |                 |
